# Supplementary material
Source: HighWire-hosted journal article supplement (http://gut.bmj.com/highwire/filestream/192786/field_highwire_adjunct_files/3/58121612webonlydata4.xls)
Supplement: 58121612webonlydata4.xls [file 58121612webonlydata4.xls]

## Sheet: Blad1
UC cohort A (R=8, NR=16)	Top 20 differentially expressed genes					UC cohort B (R=12, NR=10)	Top 20 differentially expressed genes					UC cohort A and UC cohort B (R=20, NR=26)	Top 20 differentially expressed genes
	Probe Set ID	Gene Symbol	NR-score	R-score			Probe Set ID	Gene Symbol	NR-score	R-score			Probe Set ID	Gene Symbol	NR-score	R-score
1	206172_at	IL13RA2	0.268	-0.536		1	205220_at	GPR109B	0.4899	-0.4082		1	229947_at	PI15	0.4149	-0.5394
2	206336_at	CXCL6	0.2143	-0.4286		2	204748_at	PTGS2	0.3758	-0.3132		2	1554997_a_at	PTGS2	0.4014	-0.5218
3	231227_at	WNT5A	0.2027	-0.4054		3	203591_s_at	CSF3R	0.3661	-0.3051		3	206924_at	IL11	0.4002	-0.5203
4	204597_x_at	STC1	0.1985	-0.397		4	210873_x_at	APOBEC3A	0.3655	-0.3046		4	230746_s_at	STC1	0.3996	-0.5195
5	211959_at	IGFBP5	0.1903	-0.3806		5	207008_at	IL8RB	0.3603	-0.3002		5	214974_x_at	CXCL5	0.3727	-0.4845
6	205680_at	MMP10	0.1895	-0.3789		6	205568_at	AQP9	0.3552	-0.296		6	204933_s_at	TNFRSF11B	0.3592	-0.467
7	209795_at	CD69	0.1844	-0.3689		7	210119_at	KCNJ15	0.3357	-0.2798		7	206172_at	IL13RA2	0.3567	-0.4637
8	204933_s_at	TNFRSF11B	0.1813	-0.3627		8	213524_s_at	G0S2	0.3302	-0.2752		8	205207_at	IL6	0.3417	-0.4443
9	202422_s_at	ACSL4	0.1795	-0.3591		9	230170_at	OSM	0.3259	-0.2715		9	206025_s_at	TNFAIP6	0.3332	-0.4331
10	204273_at	EDNRB	0.1548	-0.3096		10	230746_s_at	STC1	0.3192	-0.266		10	210511_s_at	INHBA	0.3314	-0.4309
11	203603_s_at	ZEB2	0.1519	-0.3039		11	212942_s_at	KIAA1199	0.3083	-0.2569		11	210873_x_at	APOBEC3A	0.3216	-0.418
12	207610_s_at	EMR2	0.1445	-0.2891		12	204933_s_at	TNFRSF11B	0.3081	-0.2567		12	206211_at	SELE	0.3201	-0.4162
13	209070_s_at	RGS5	0.144	-0.288		13	205067_at	IL1B	0.3066	-0.2555		13	206569_at	IL24	0.3133	-0.4073
14	213338_at	TMEM158	0.1428	-0.2857		14	205119_s_at	FPR1	0.2938	-0.2449		14	205990_s_at	WNT5A	0.2998	-0.3897
15	210895_s_at	CD86	0.1426	-0.2852		15	214511_x_at	FCGR1B	0.2372	-0.1977		15	205828_at	MMP3	0.2946	-0.3829
16	211671_s_at	NR3C1	0.1387	-0.2774		16	220088_at	C5AR1	0.2341	-0.1951		16	201645_at	TNC	0.2917	-0.3792
17	206953_s_at	LPHN2	0.1381	-0.2762		17	203140_at	BCL6	0.1927	-0.1606		17	227697_at	SOCS3	0.2717	-0.3532
18	209868_s_at	RBMS1	0.1287	-0.2574		18	204924_at	TLR2	0.1911	-0.1592		18	224940_s_at	PAPPA	0.2637	-0.3428
19	218854_at	DSE	0.1278	-0.2557		19	232224_at	MASP1	0.1786	-0.1488		19	229435_at	GLIS3	0.2353	-0.3059
20	212526_at	SPG20	0.1273	-0.2546		20	217167_x_at	GK	0.0799	-0.0666		20	210664_s_at	TFPI	0.2157	-0.2804
UC cohort A (R=8, NR=16)	Top 5 differentially expressed genes					UC cohort B (R=12, NR=10)	Top 5 differentially expressed genes					UC cohort A and UC cohort B (R=20, NR=26)	Top 5 differentially expressed genes
	Probe Set ID	Gene Symbol	NR-score	R-score			Probe Set ID	Gene Symbol	NR-score	R-score			Probe Set ID	Gene Symbol	NR-score	R-score
1	206172_at	IL13RA2	0.296	-0.5919		1	205220_at	GPR109B	0.5164	-0.4304		1	1554997_a_at	PTGS2	0.2513	-0.3267
2	210895_s_at	CD86	0.1661	-0.3323		2	203591_s_at	CSF3R	0.3936	-0.328		2	206924_at	IL11	0.2503	-0.3254
3	213338_at	TMEM158	0.1648	-0.3296		3	230746_s_at	STC1	0.3475	-0.2896		3	230746_s_at	STC1	0.2494	-0.3242
4	211671_s_at	NR3C1	0.1607	-0.3215		4	204933_s_at	TNFRSF11B	0.3372	-0.281		4	204933_s_at	TNFRSF11B	0.2087	-0.2713
5	206953_s_at	LPHN2	0.1602	-0.3204		5	205067_at	IL1B	0.333	-0.2775		5	206172_at	IL13RA2	0.2066	-0.2686
